# Supplementary material
Source: Springer Nature journal article supplement (https://www.springermedizin.de/resource/supplementary/12968_2009_510_MOESM4_ESM.pdf/9579140)

**Patients (n)**

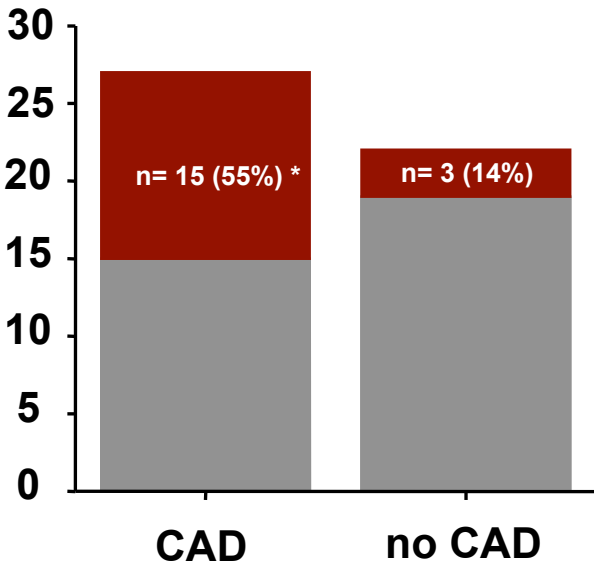

Supplement: MOESM4 [file 9579140]
